# Supplementary material
Source: PubMed Central journal article supplement (PMC7983668)
Supplement: rycan190074suppa1.pdf [file rycan190074suppa1.pdf]

**Table E1. Univariate Analysis for OS and DMFS of Patients with High Delta Tumors Measured on Dual-Energy CT Image Types**

| Image Type       | OS                |         |                   |         | DMFS                |         |
|------------------|-------------------|---------|-------------------|---------|---------------------|---------|
|                  | Lower Stage       |         | Higher Stage      |         | Non-Metastatic PDAC |         |
|                  | HR                | P value | HR                | P value | HR                  | P value |
| 70 keV           | 1.3 (0.68, 2.42)  | .4      | 1.9 (1.2, 3.1)    | .007    | 2.7 (1.24, 5.9)     | 0.01    |
| 52 keV           | 1.66 (0.77, 3.3)  | .18     | 1.77 (1.11, 2.8)  | .01     | 2.6 (1.2, 5.7)      | 0.02    |
| Iodine           | 1.71 (0.78, 3.47) | .17     | 1.61 (0.99, 2.57) | .52     | 2.3 (1.02, 5.12)    | 0.04    |
| Conventional PVP | 1.91 (0.91, 3.8)  | .08     | 1.56 (0.98, 2.49) | .058    | 1.44 (0.63, 3.1)    | 0.37    |

Note.—Data in parentheses are 95% confidence intervals. Patients with low delta tumors were used as reference. DMFS = distant metastasis-free survival, HR = hazard ratio, OS = overall survival, PDAC = pancreatic ductal adenocarcinoma, PVP = portal venous phase

**Table E2. Distribution of High and Low Delta Tumors within PVP-based Delta Classification**

|            | High Delta on<br>Conventional PVP<br>(n = 66) | Low Delta on<br>Conventional PVP<br>(n = 92) |
|------------|-----------------------------------------------|----------------------------------------------|
| 70 keV PPP |                                               |                                              |
| High delta | 48 (73)                                       | 29 (32)                                      |
| Low delta  | 18 (27)                                       | 63 (68)                                      |
| 52 keV PPP |                                               |                                              |
| High delta | 35 (53)                                       | 18 (20)                                      |
| Low delta  | 31 (47)                                       | 74 (80)                                      |
| Iodine PPP |                                               |                                              |
| High delta | 29 (44)                                       | 14 (15)                                      |
| Low delta  | 37 (56)                                       | 78 (85)                                      |

Note.—Except where otherwise noted, data in parentheses are percentages. PPP = pancreatic parenchymal phase, PVP = portal venous phase
